# Supplementary material for: Predictors of in-hospital COVID-19 mortality: A comprehensive systematic review and meta-analysis exploring differences by age, sex and health conditions
Source: PubMed Central journal article supplement (PMC7608886; doi:10.1371/journal.pone.0241742), 2020-11-03
Supplement: pone.0241742.s004.pdf [file pone.0241742.s004.pdf]

## **Supporting Information**

**Predictors of in-hospital COVID-19 mortality: a comprehensive systematic review and meta-analysis exploring differences by age, sex and health conditions.**

**S3 Appendix: Forest plots, funnel plots and Egger's test p-values.**

*(Please, find the corresponding information on the following pages)*

# Dyspnoea

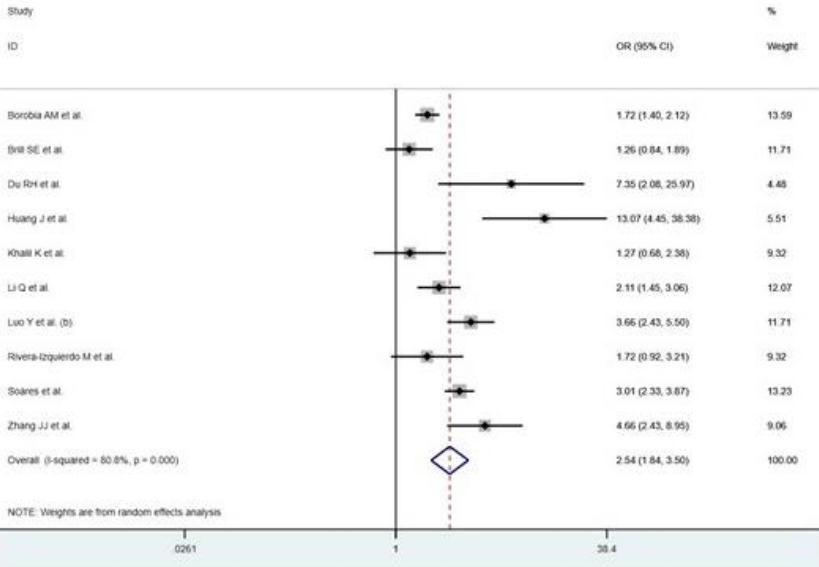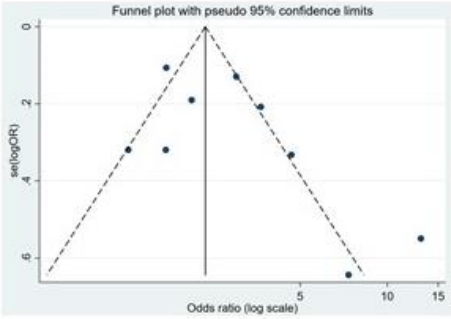

Egger's test: p-value=0.17

# Vomiting

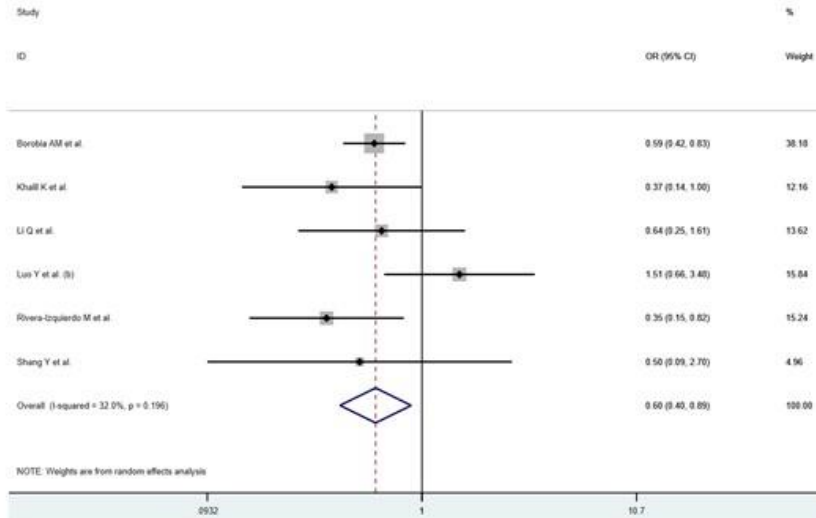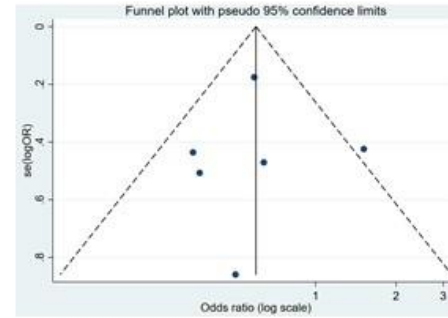

Egger's test: p-value=0.93

# Fatigue

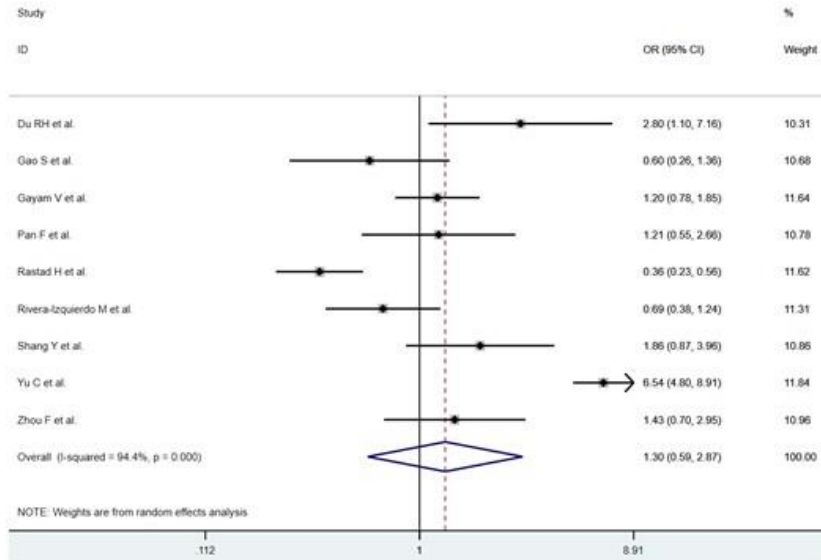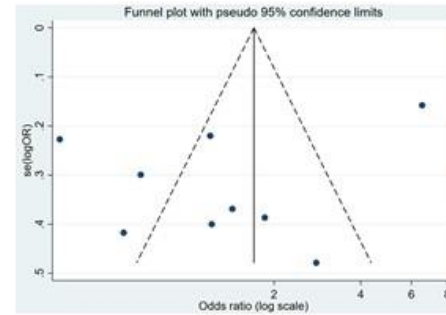

Egger's test: p-value=0.25

# Fever

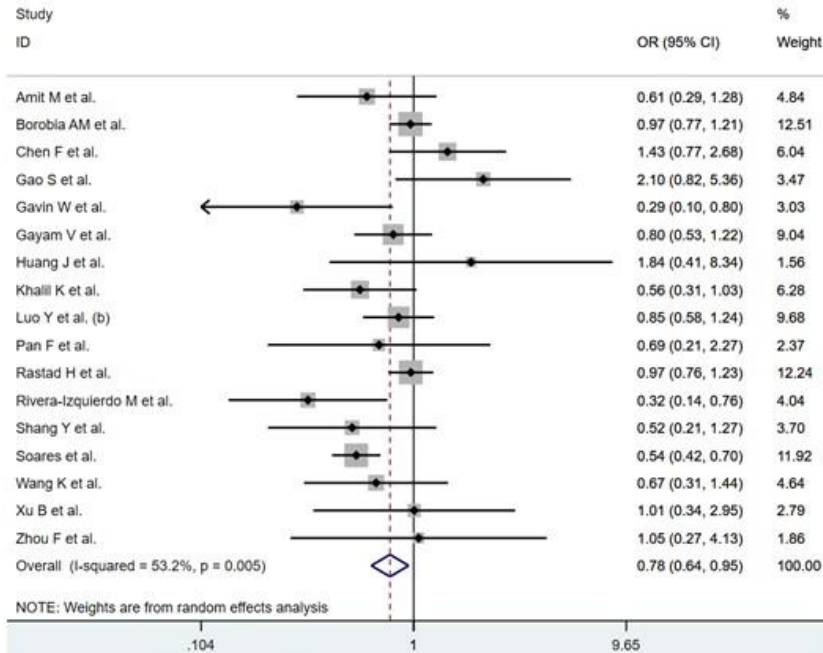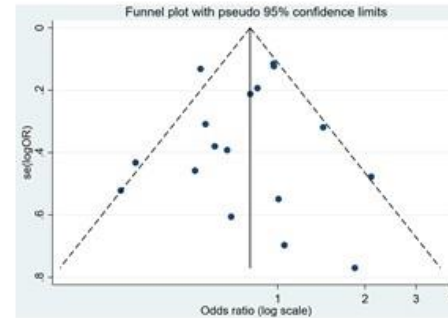

Egger's test: p-value=0.68

# Myalgia

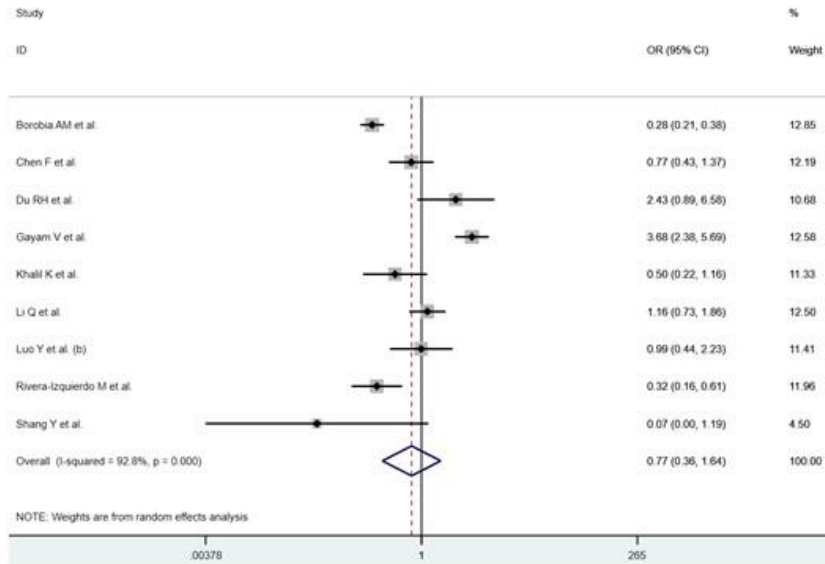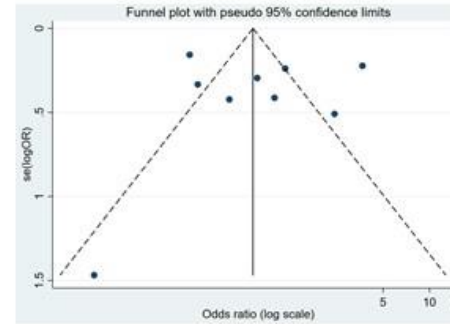

Egger's test: p-value=0.74

# Cough

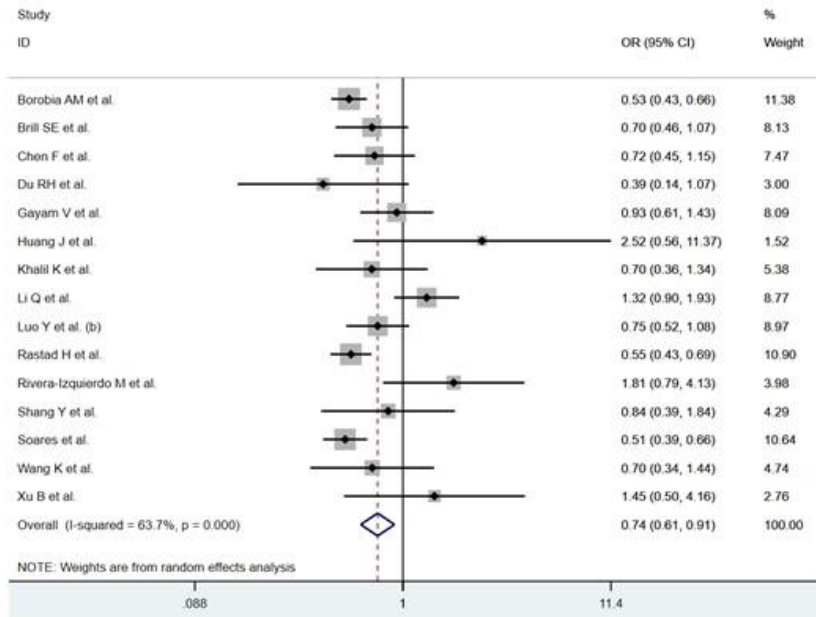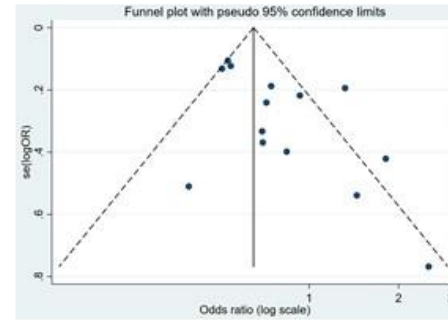

Egger's test: p-value=0.022

# Diarrhoea

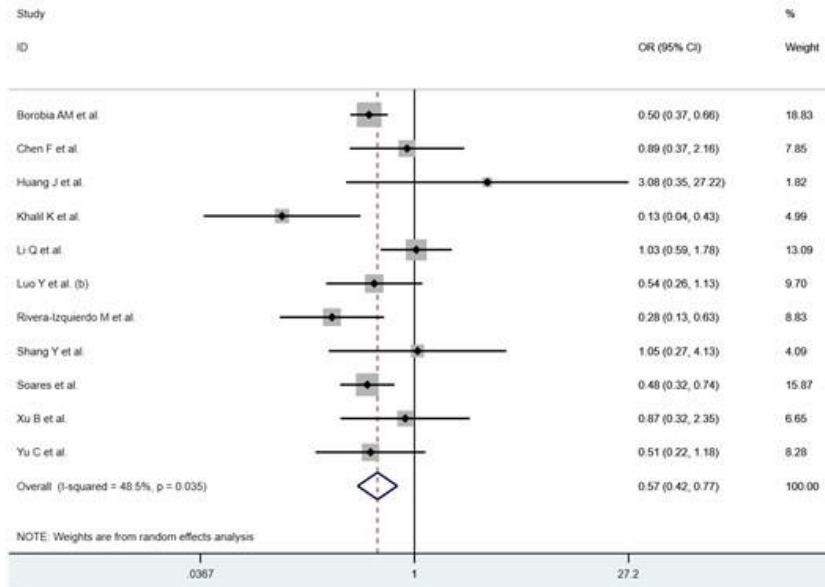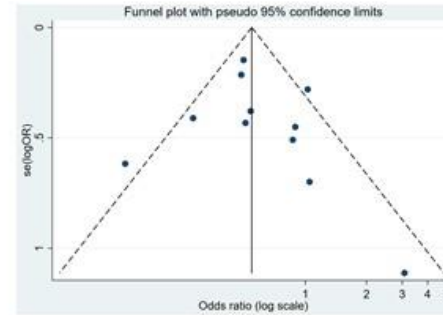

Egger's test: p-value=0.56



# Headache

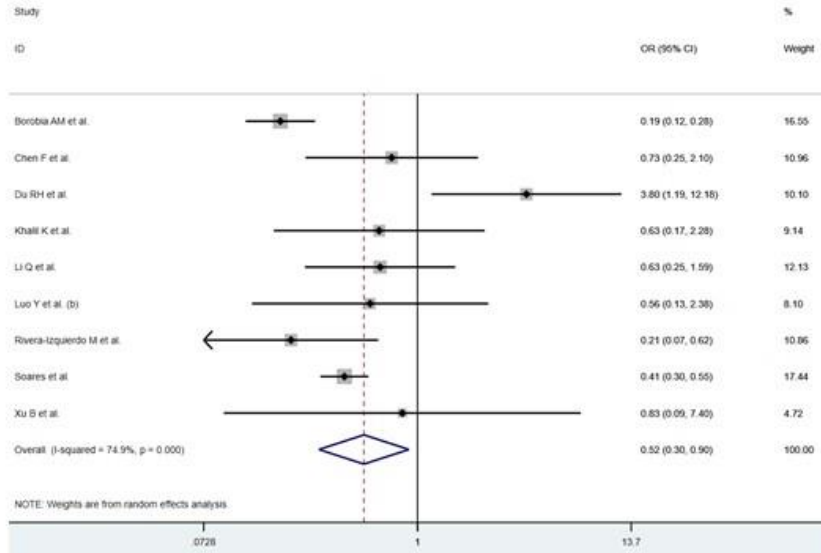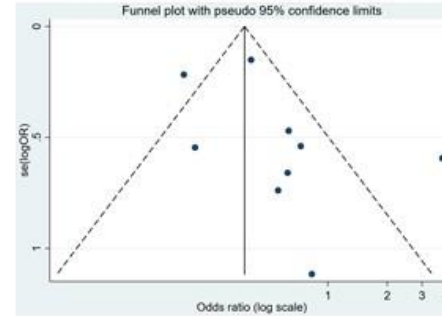

Egger's test: p-value=0.22

# Obesity

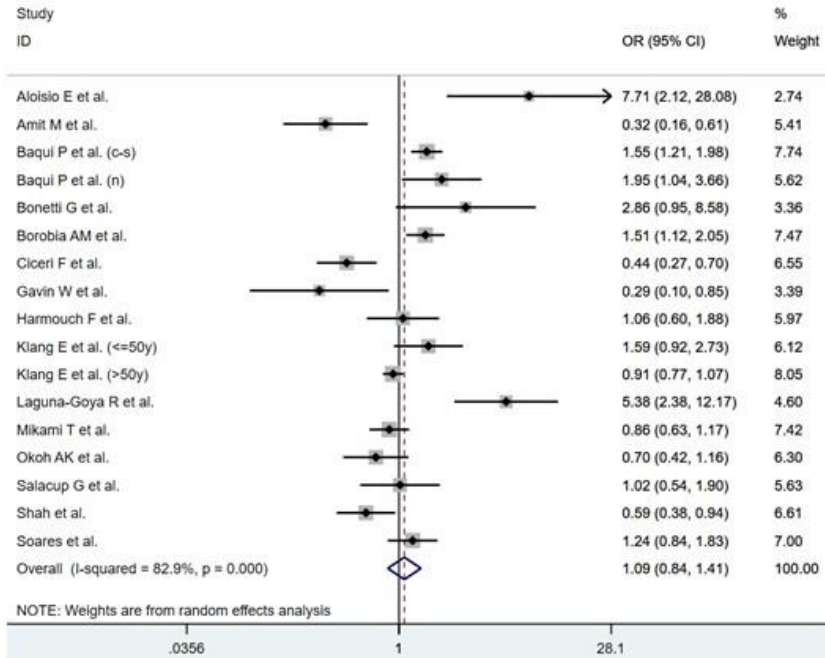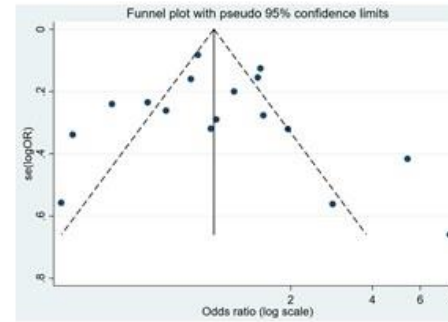

Egger's test: p-value=0.66

# BMI

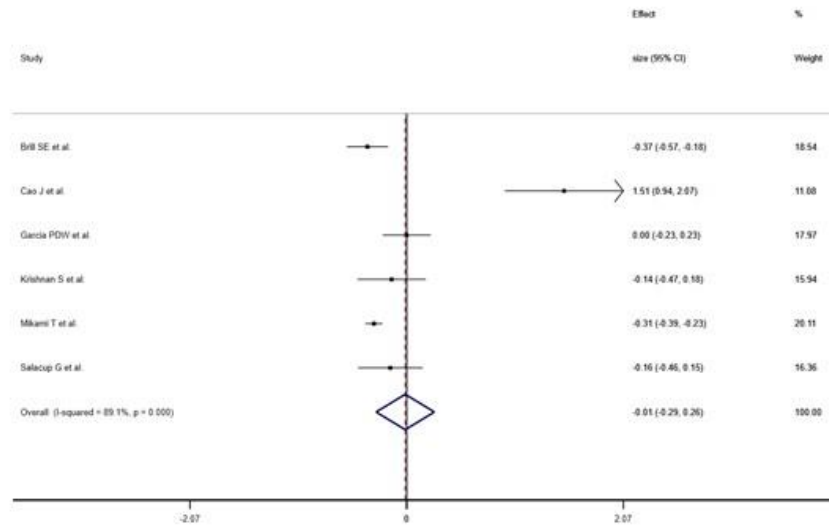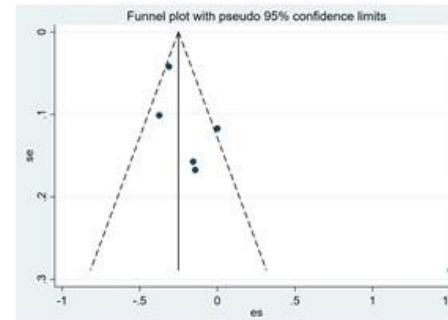

Egger's test: p-value=0.103

## Smoking habit (yes/no)

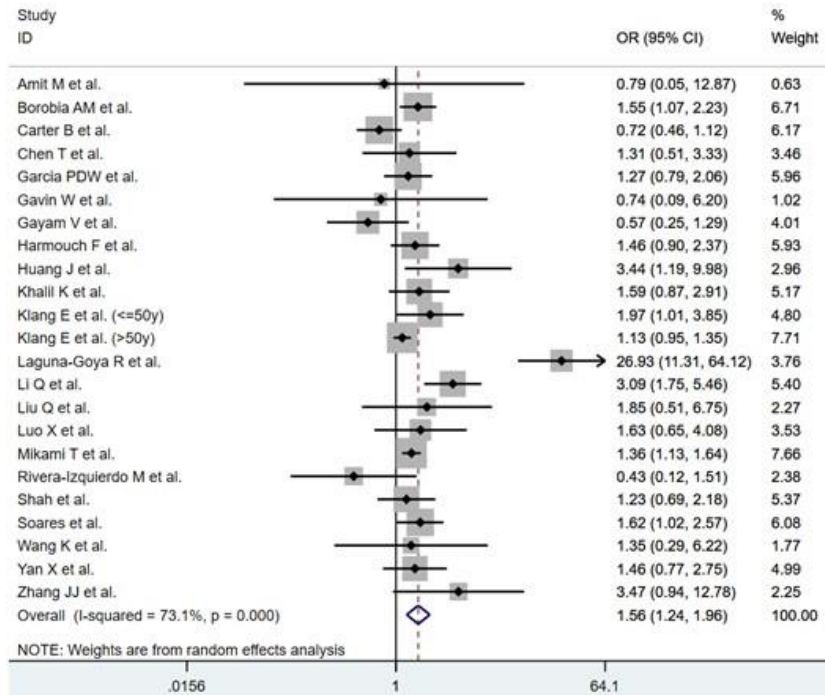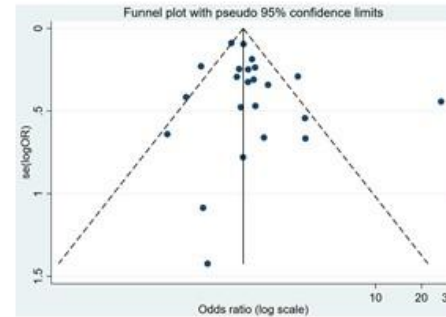

Egger's test: p-value=0.23

## Unspecified comorbidity

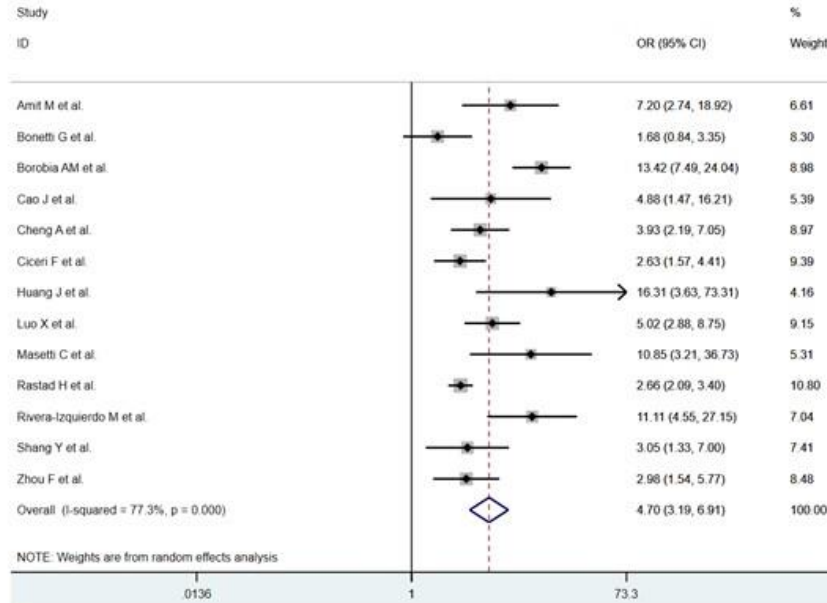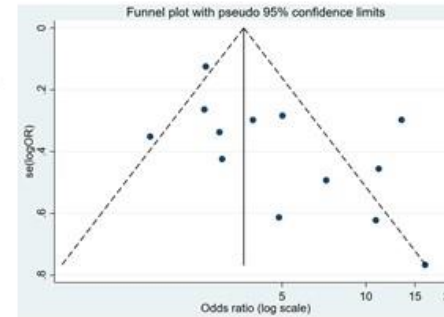

Egger's test: p-value=0.045

# Stroke

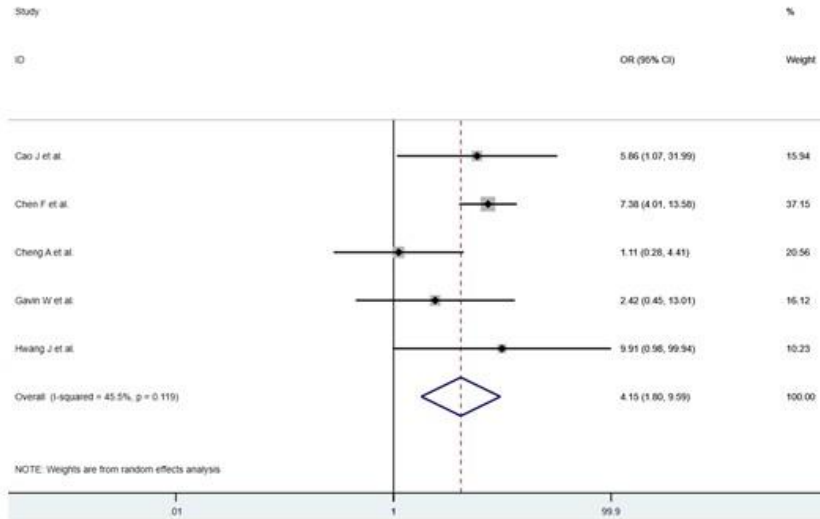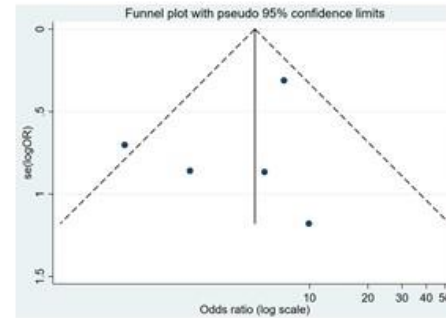

Egger's test: p-value=0.44

# Kidney disease

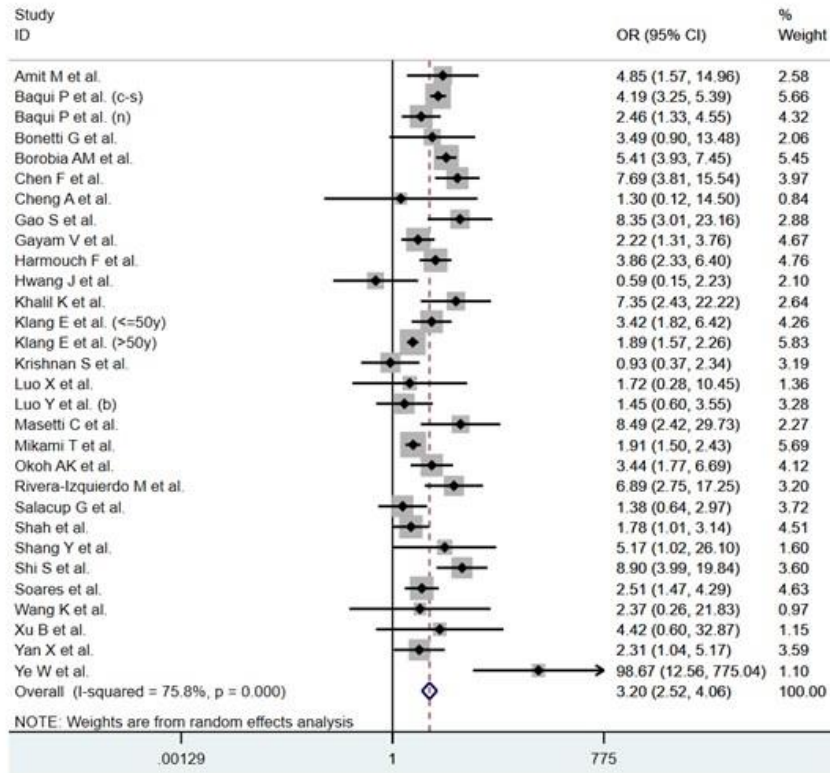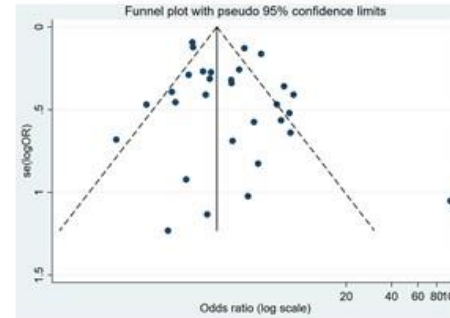

Egger's test: p-value=0.15

# Cardiovascular disease

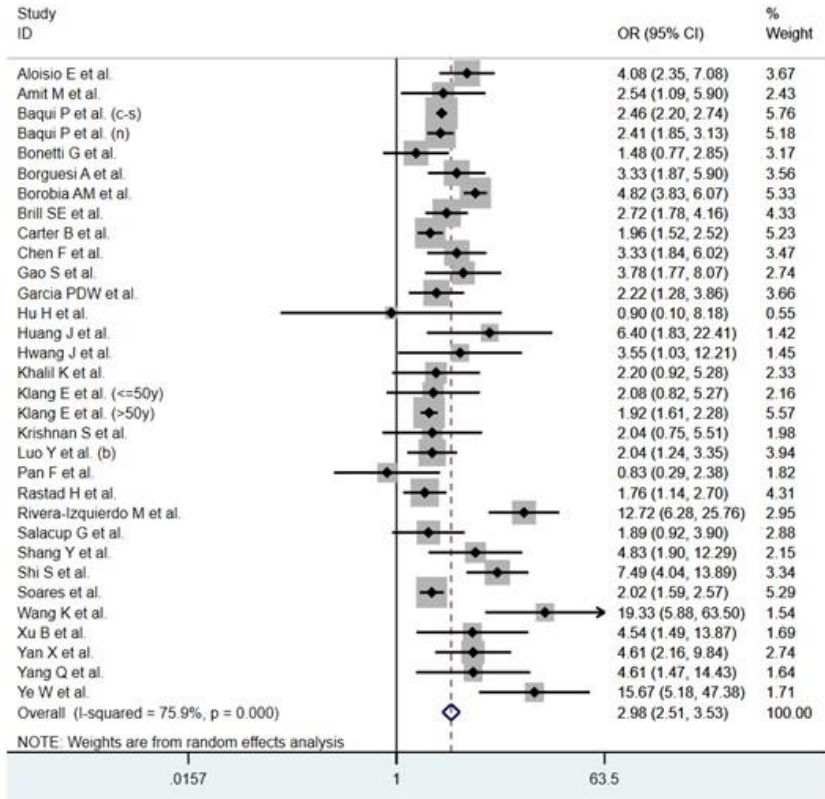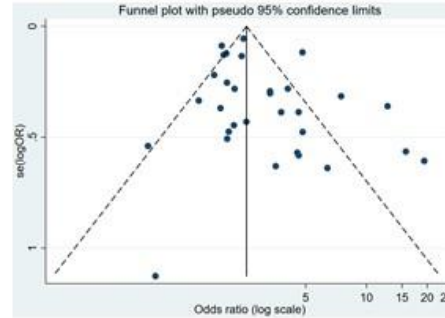

Egger's test: p-value=0.077



# Hypertension

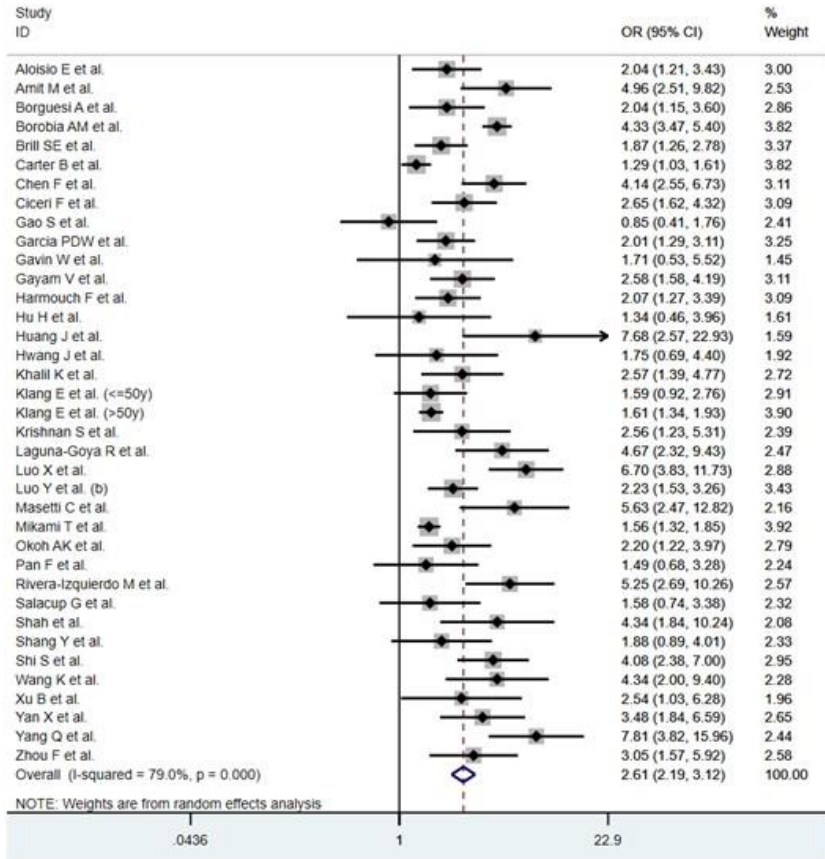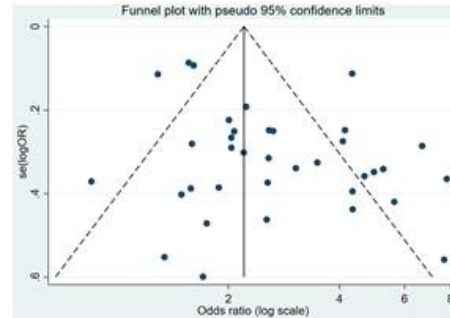

Egger's test: p-value=0.014

# Malignancy

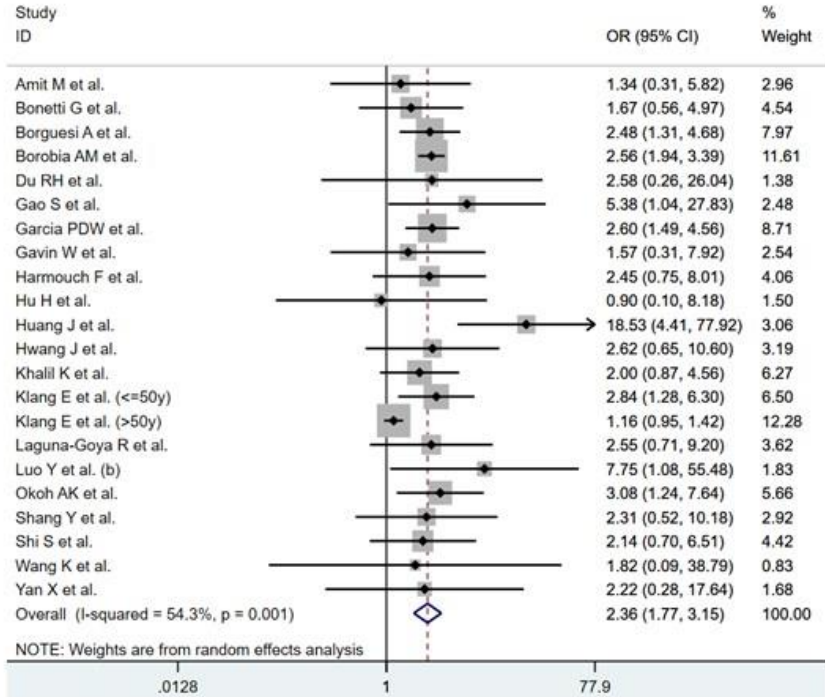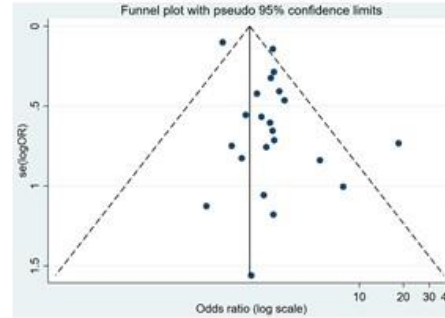

Egger's test: p-value=0.019

# Diabetes

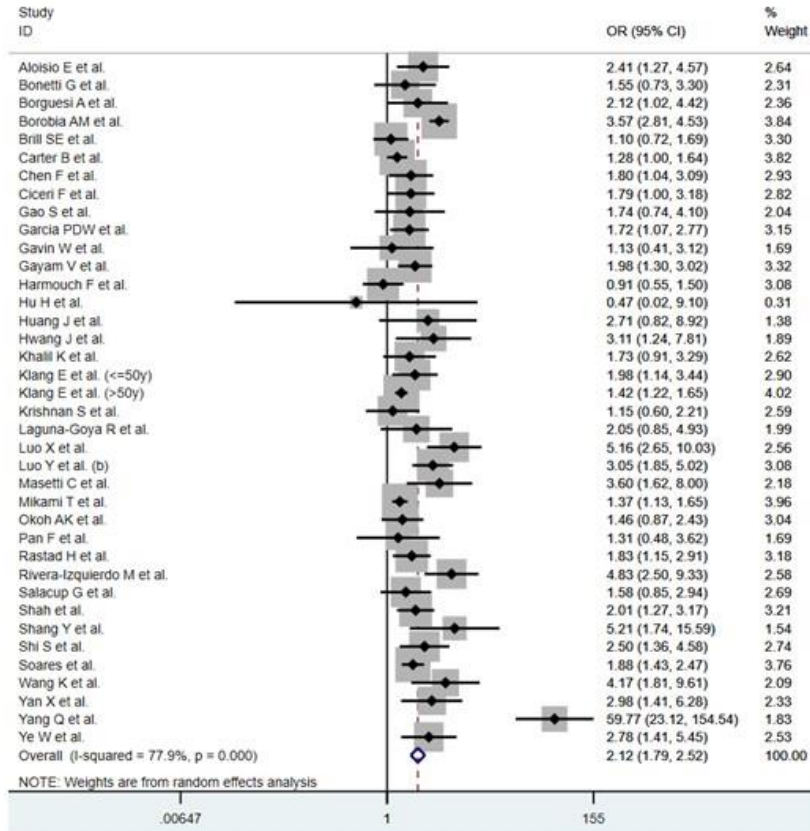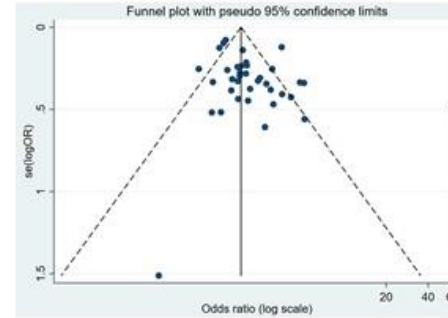

Egger's test: p-value=0.018

# Pulmonary disease

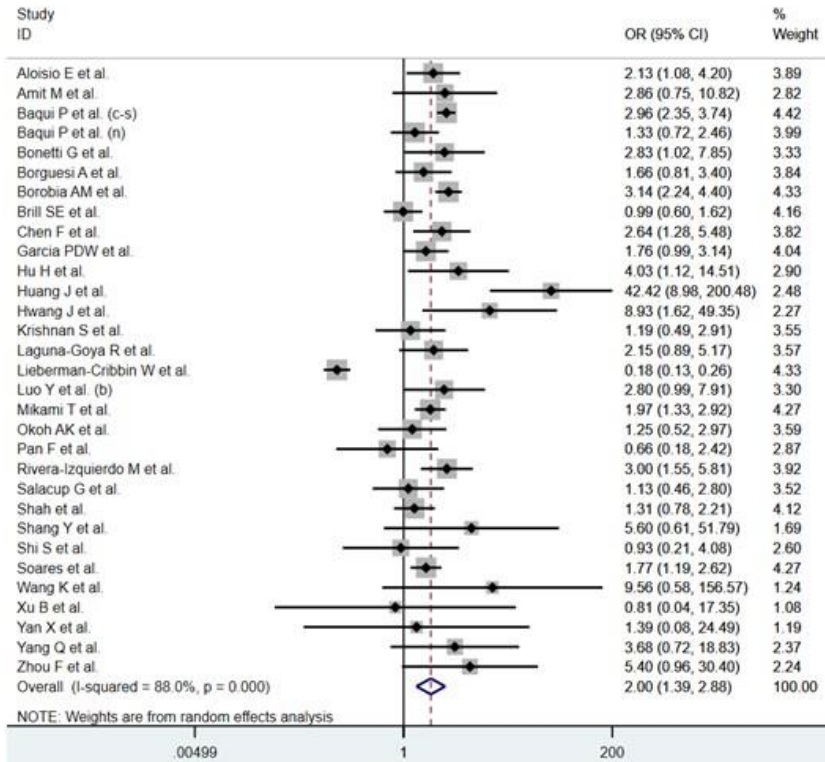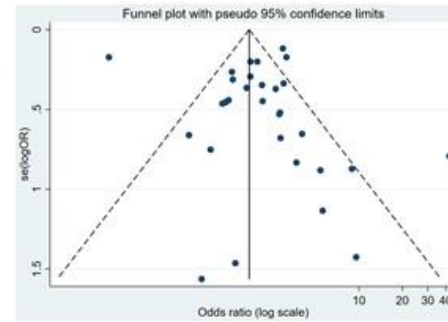

Egger's test: p-value=0.48

# Liver disease

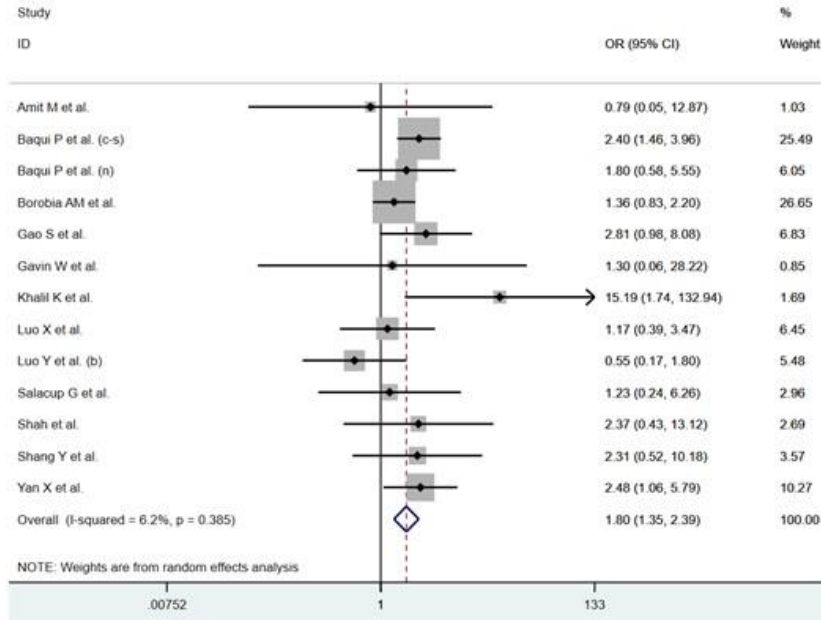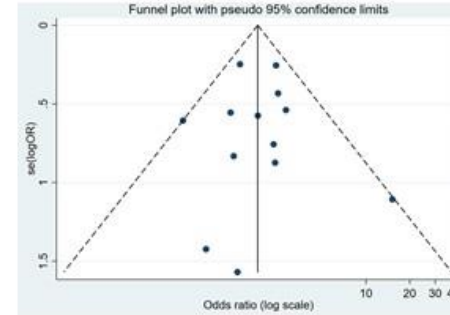

Egger's test: p-value=0.92

# Lymphocyte count

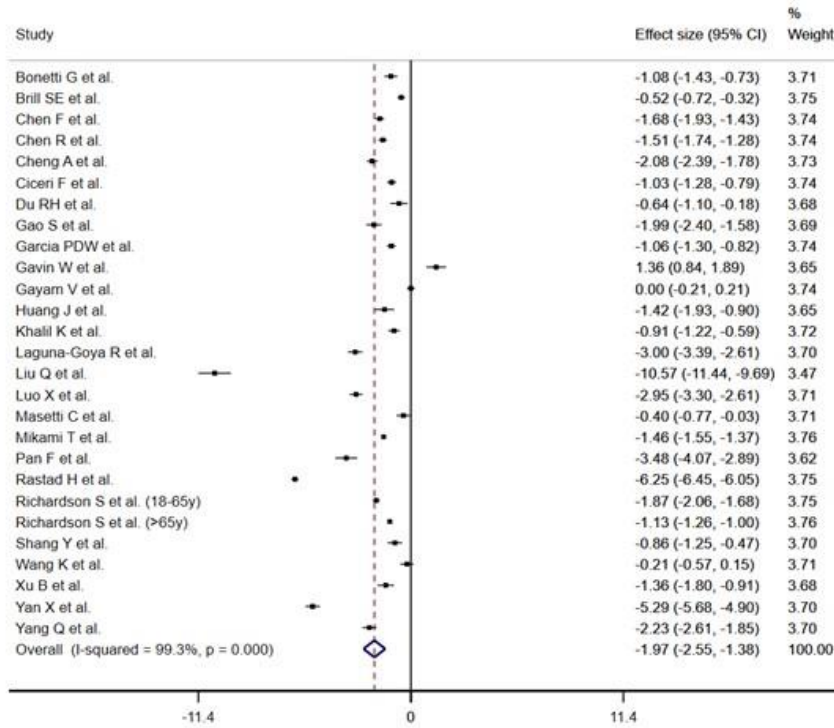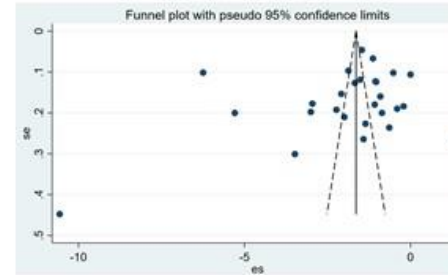

Egger's test: p-value=0.43

# Leucocyte count

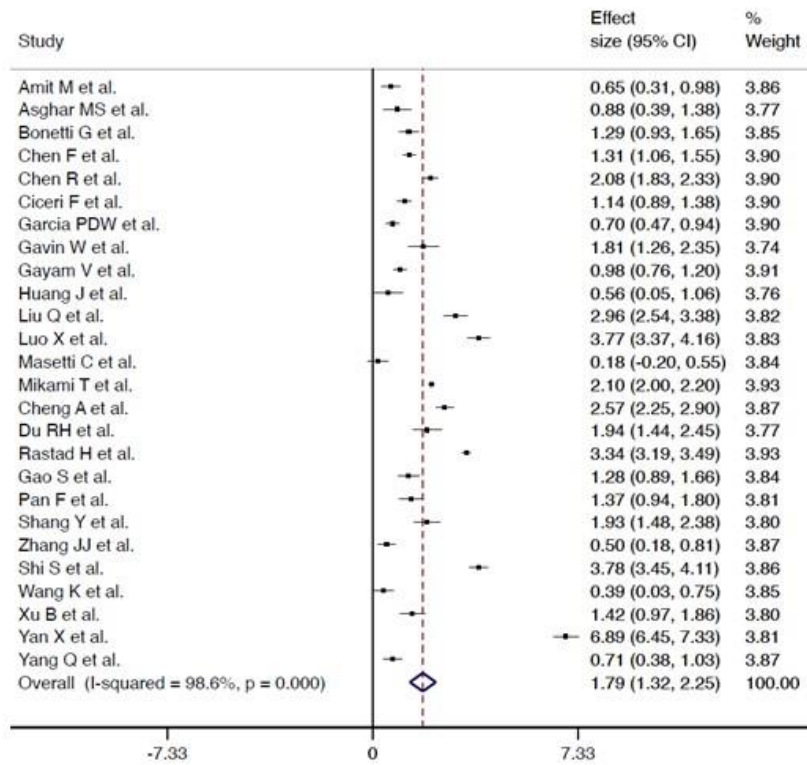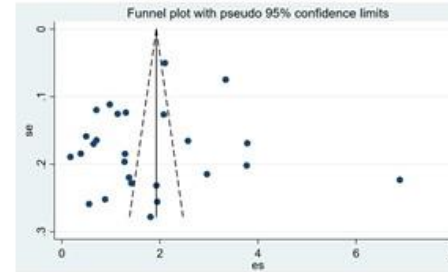

Egger's test: p-value=0.62

# Neutrophil count

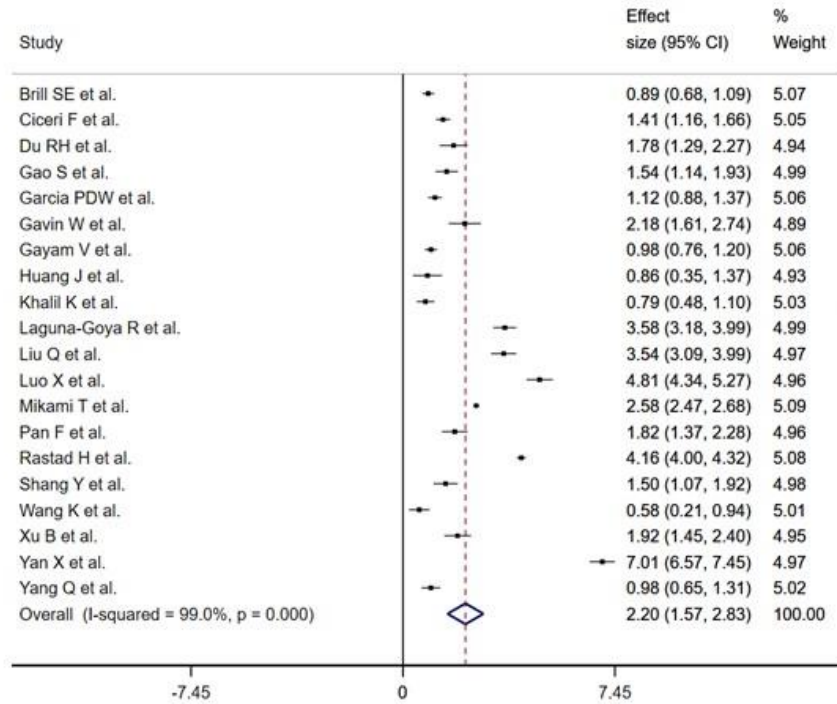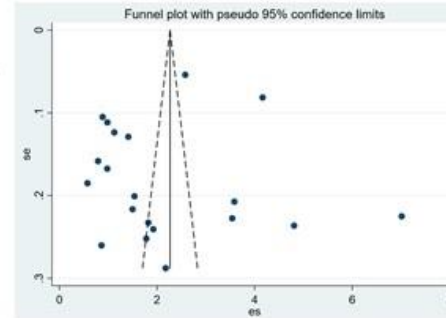

Egger's test: p-value=0.48



# Platelet count

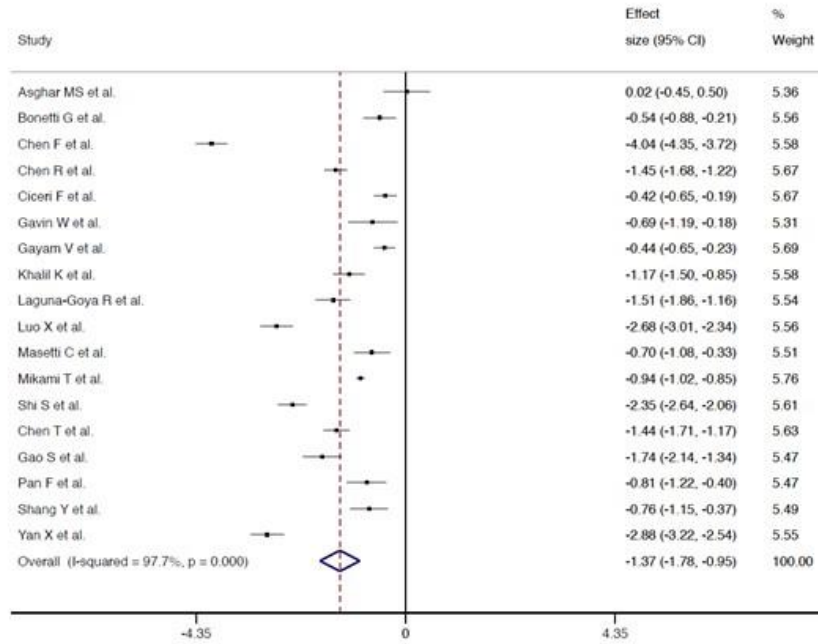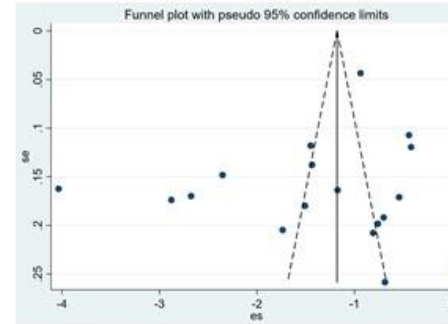

Egger's test: p-value=0.20

# Hemoglobin

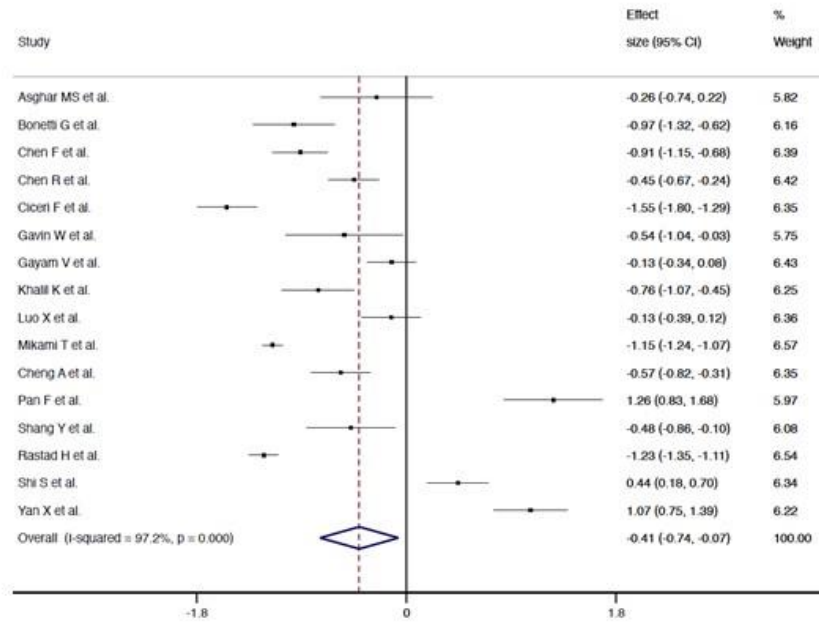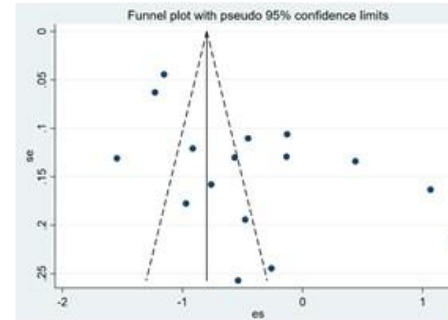

Egger's test: p-value=0.013

# D-dimer

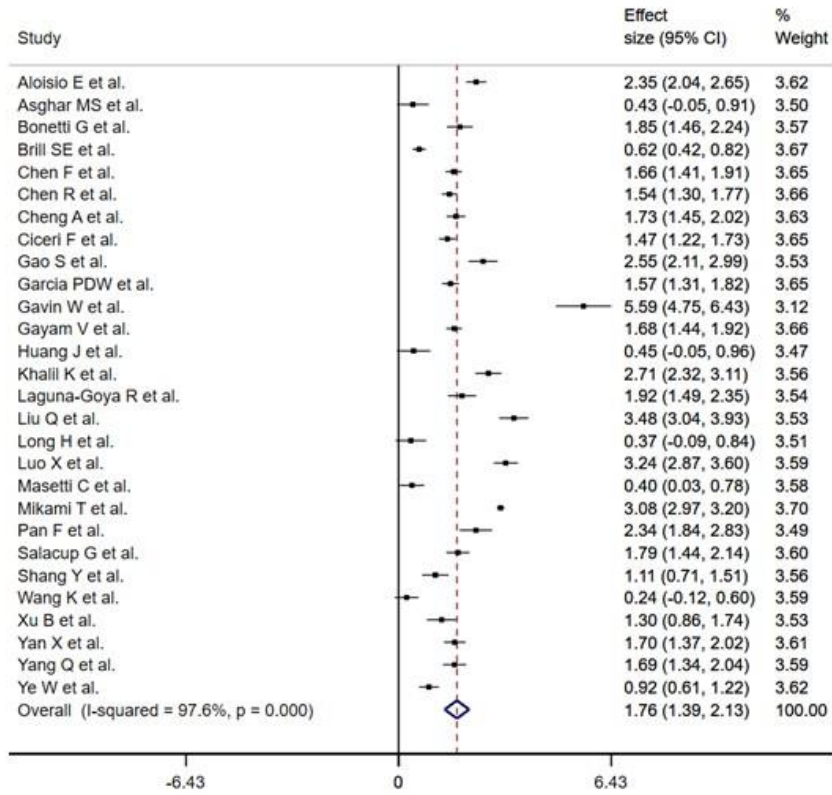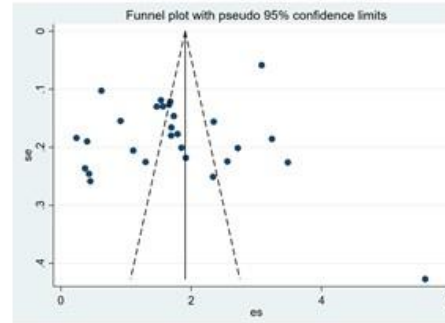

Egger's test: p-value=0.76

# Prothrombin time

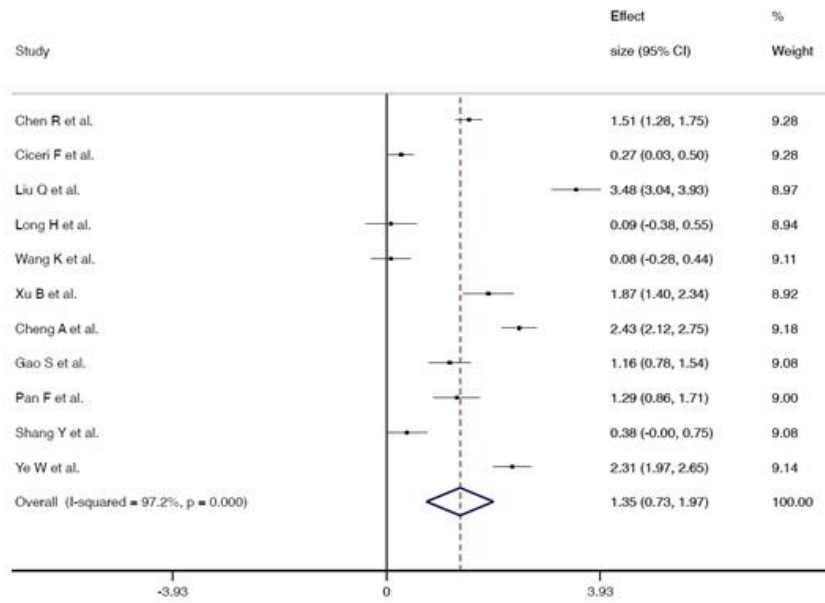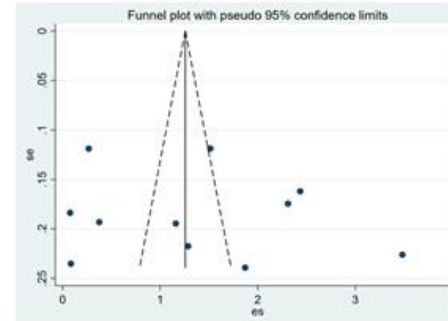

Egger's test: p-value=0.081

# APTT

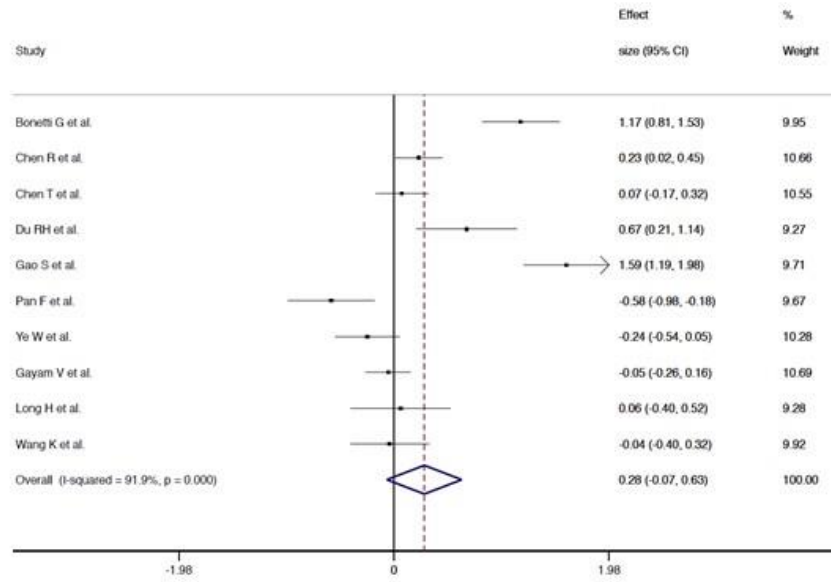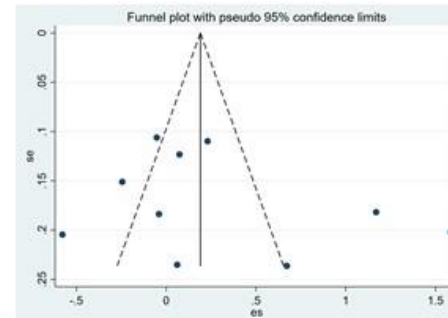

Egger's test: p-value=0.27

# Albumin

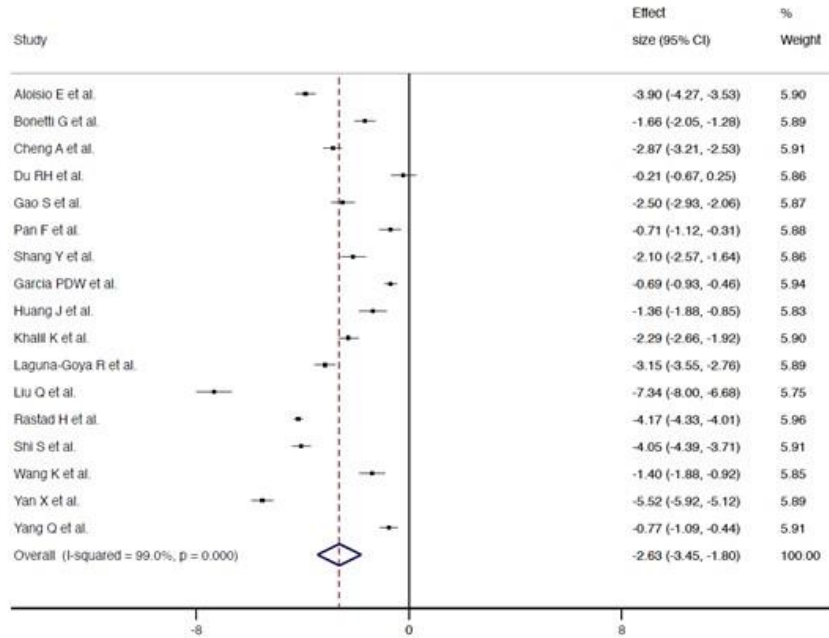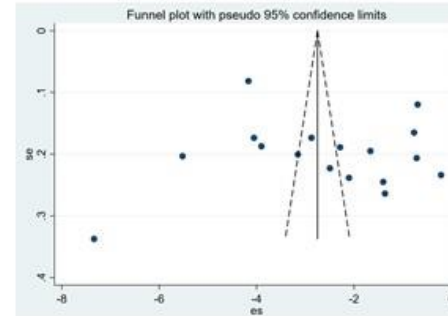

Egger's test: p-value=0.65

# Total bilirubin

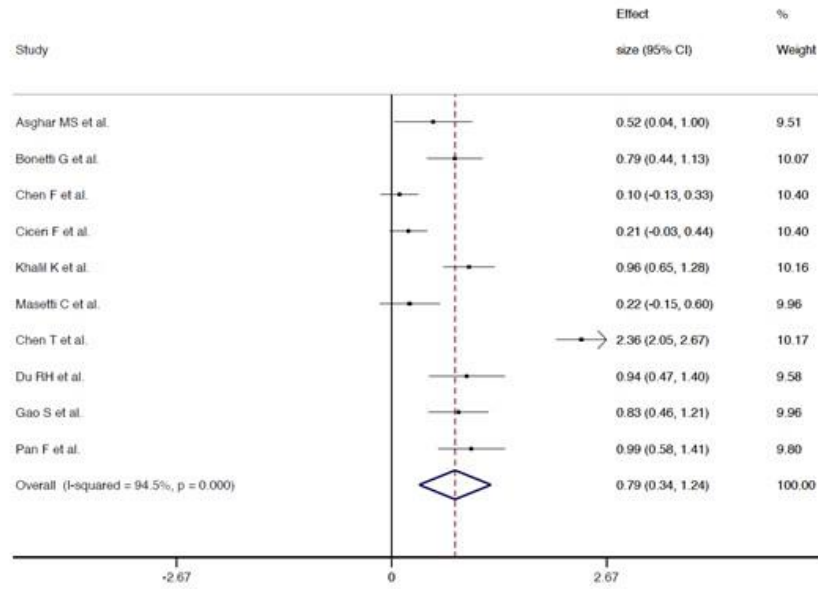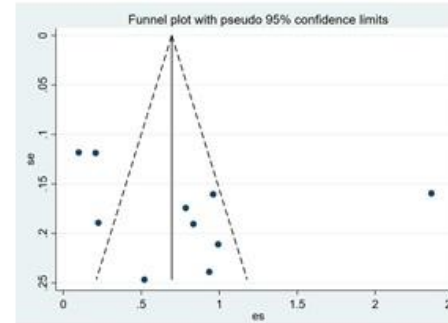

Egger's test: p-value=0.27

# AST

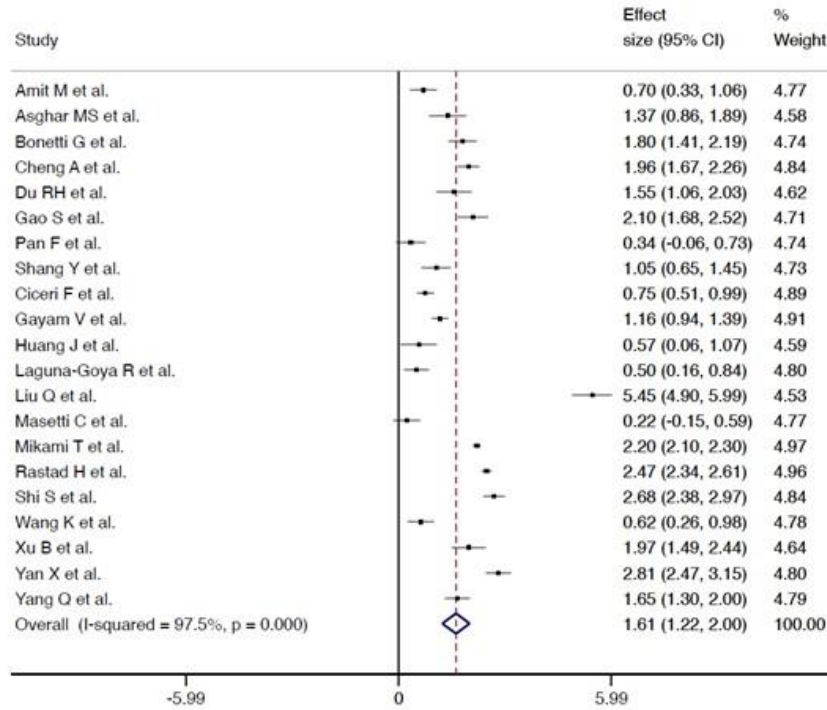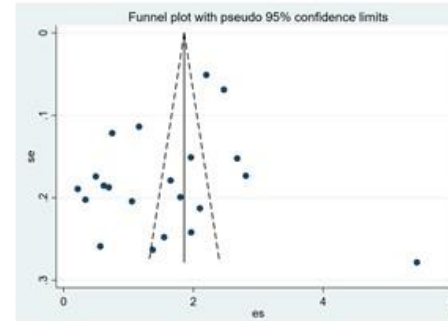

Egger's test: p-value=0.92



# ALT

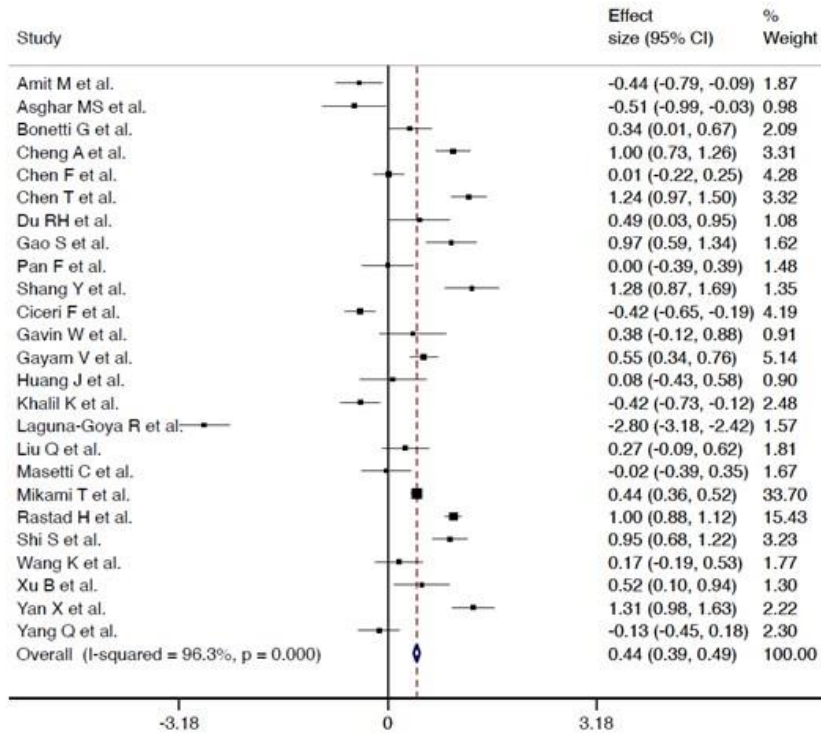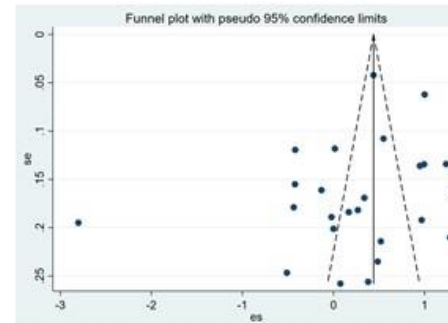

Egger's test: p-value=0.35

# Urea nitrogen

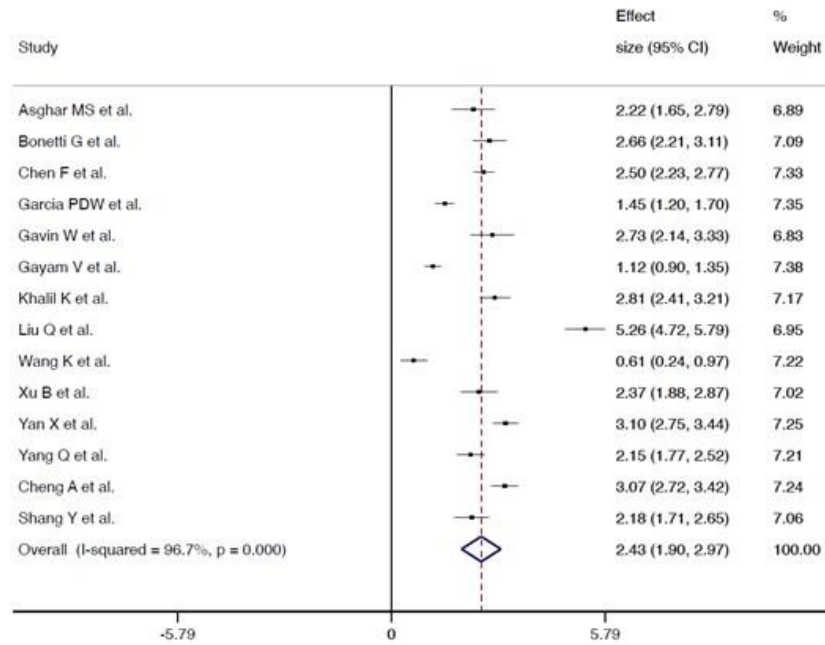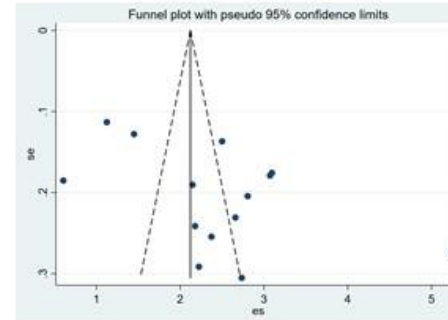

Egger's test: p-value=0.008

# Creatinine

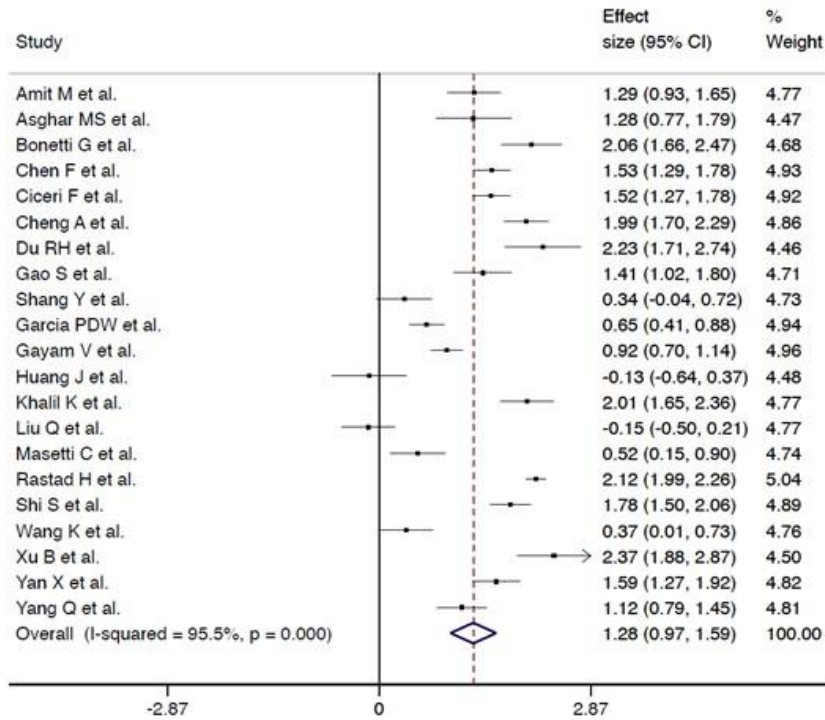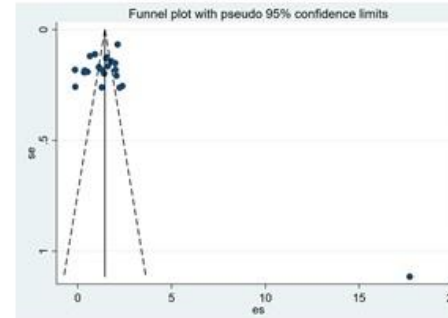

Egger's test: p-value=0.33

# CRP

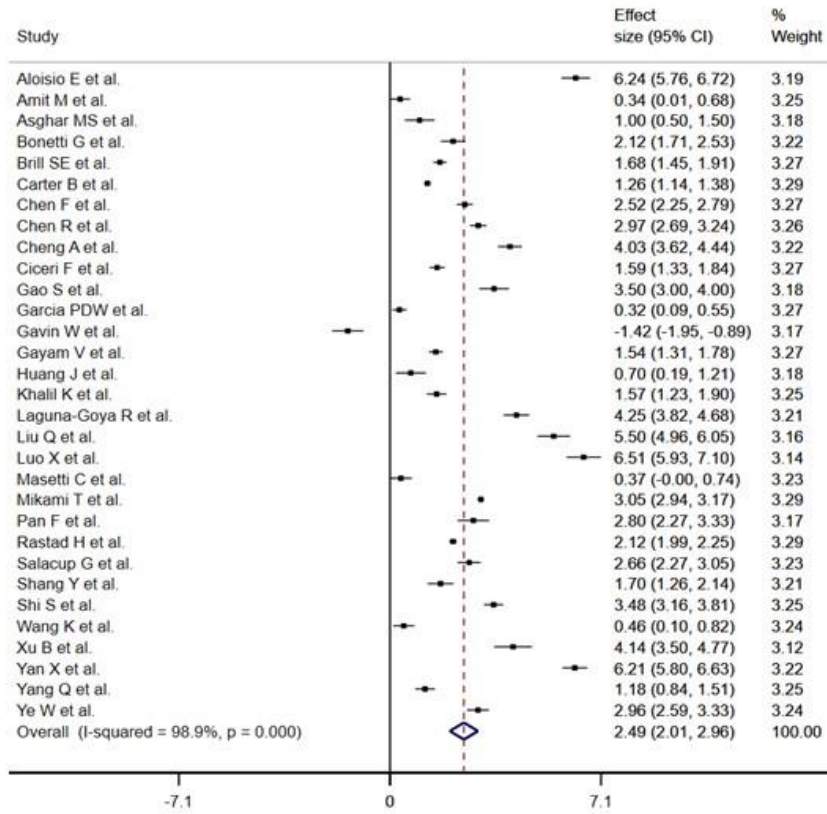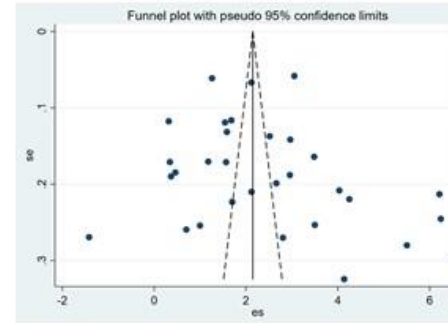

Egger's test: p-value=0.056

# Interleukin-6

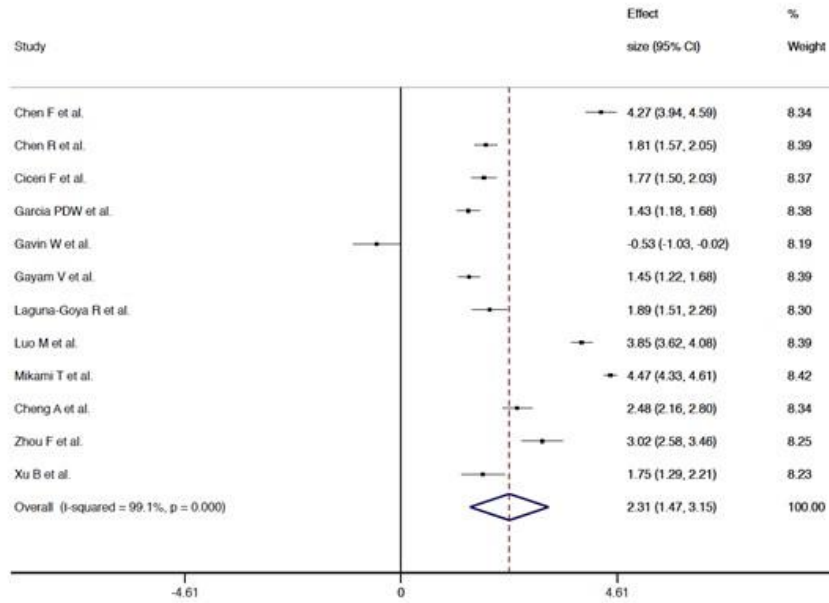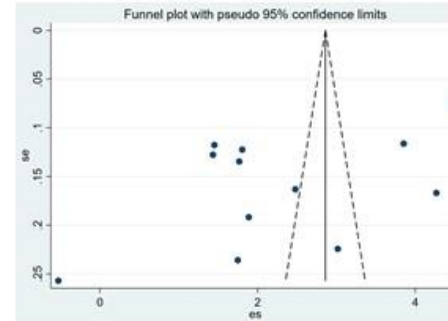

Egger's test: p-value=0.63

# LDH

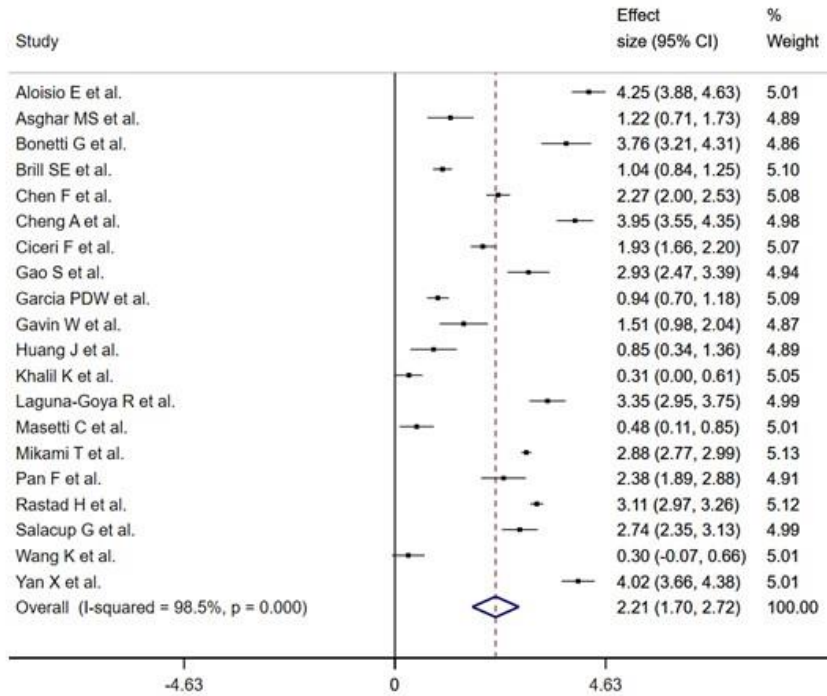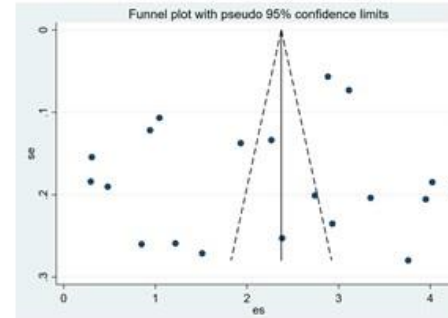

Egger's test: p-value=0.81

# Procalcitonin

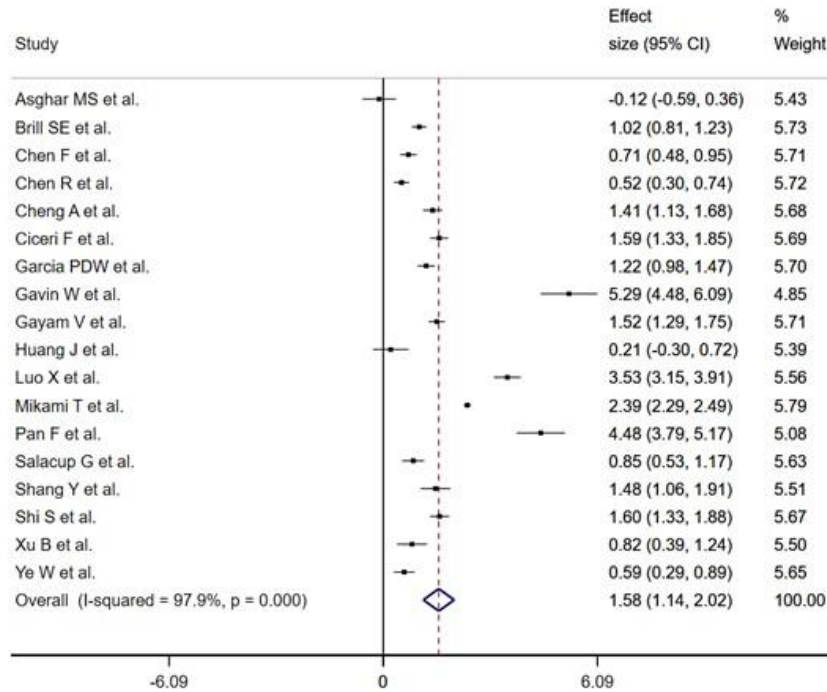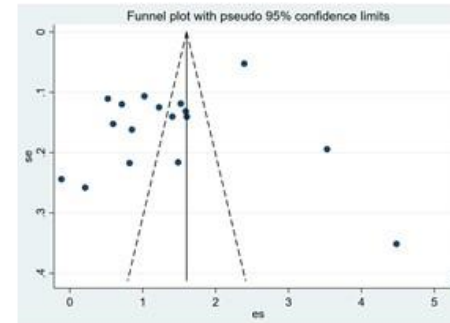

Egger's test: p-value=0.37

# Ferritin

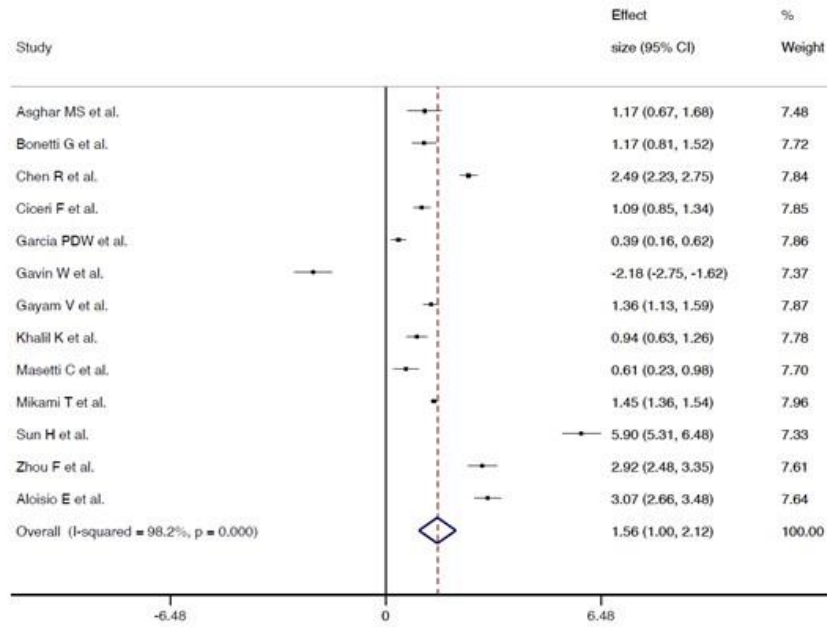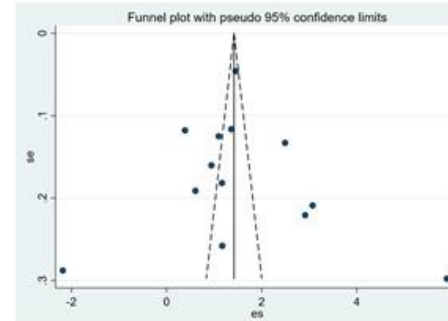

Egger's test: p-value=0.67



# Cardiac troponin-I

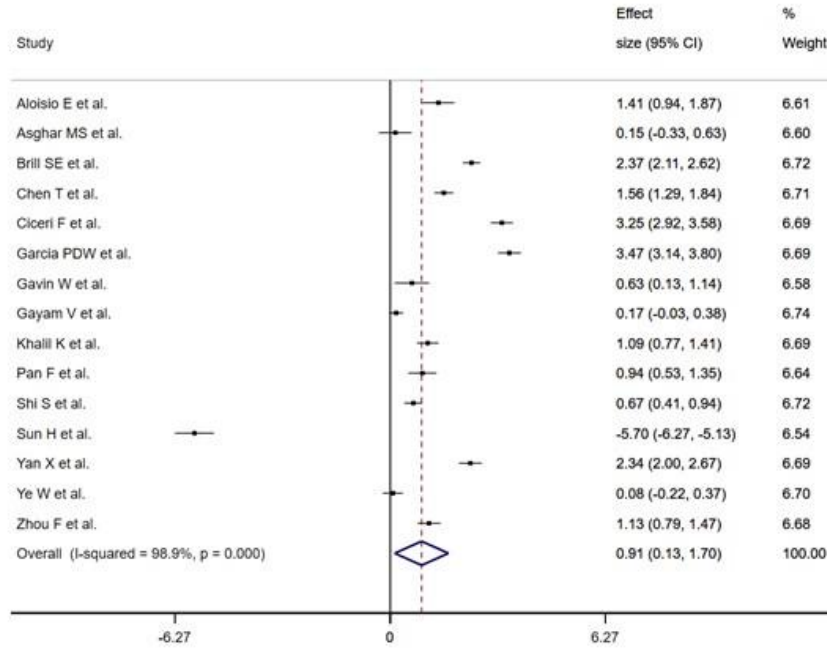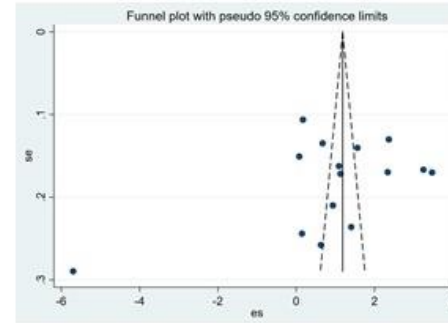

Egger's test: p-value=0.85

# ESR

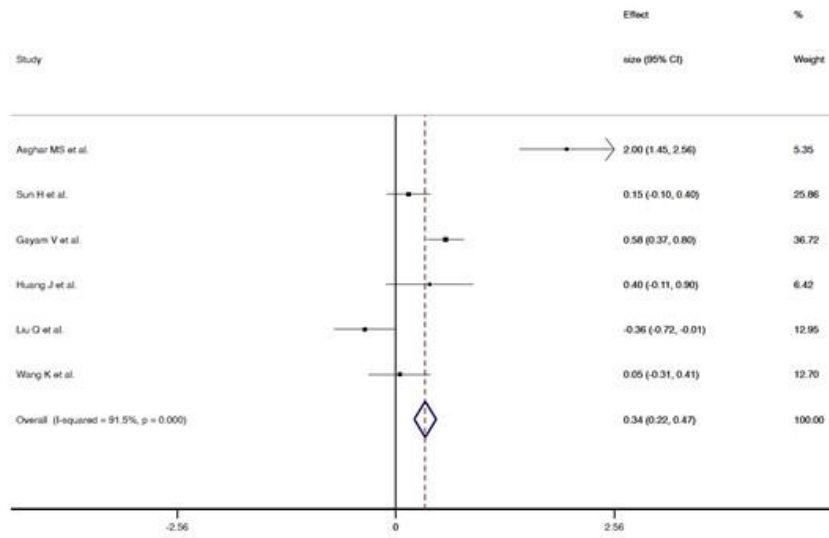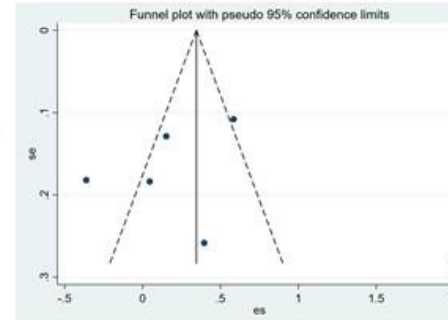

Egger's test: p-value=0.80
