# Supplementary material for: Predictors of in-hospital COVID-19 mortality: A comprehensive systematic review and meta-analysis exploring differences by age, sex and health conditions
Source: PubMed Central journal article supplement (PMC7608886; doi:10.1371/journal.pone.0241742), 2020-11-03
Supplement: pone.0241742.s005.pdf [file pone.0241742.s005.pdf]

## Supporting Information

**Predictors of in-hospital COVID-19 mortality: a comprehensive systematic review and meta-analysis exploring differences by age, sex and health conditions**

**S1 Table. Description of sub-groups and corresponding criteria.**

| Authors                      | Predominant age |             | Predominant sex |             | Predominant health condition |                                             |      |
|------------------------------|-----------------|-------------|-----------------|-------------|------------------------------|---------------------------------------------|------|
|                              | >60.0 years     | Age (years) | ≥60.0 % men     | Male sex, % | >50.0 of prevalence          | Most prevalent chronic condition of illness | %    |
| Aloisio E et al.             | Yes             | 61.3 ± 6.6  | Yes             | 68.6        | No                           | Hypertension                                | 32.8 |
| Amit M et al.                | Yes             | 71.5 ± 6.3  | Yes             | 69.0        | Yes                          | Comorbidity                                 | 80.8 |
| Asghar MS et al.             | No              | 52.6 ± 15.7 | Yes             | 69.0        | No                           | -                                           |      |
| Baqi P et al. (Centra-South) | No              | 58.2 ± 17.8 | No              | 58.0        | No                           | Cardiovascular disease                      | 34.6 |
| Baqi P et al. (North)        | No              | 58.8 ± 19.4 | No              | 58.9        | No                           | Cardiovascular disease                      | 31.1 |
| Bonetti G et al.             | Yes             | 69.1 ± 8.9  | Yes             | 66.7        | Yes                          | Comorbidity                                 | 63.9 |
| Borghesi A et al.            | Yes             | 67.0 ± 5.8  | Yes             | 64.2        | Yes                          | Hypertension                                | 51.0 |
| Borobia AM et al.            | Yes             | 61.5 ± 9.2  | No              | 48.2        | Yes                          | Comorbidity                                 | 78.5 |
| Brill SE et al.              | No              | 69.9 ± 7.0  | No              | 59.8        | No                           | Hypertension                                | 43.2 |
| Cao J et al.                 | No              | 53.0 ± 8.7  | No              | 52.0        | No                           | Comorbidity                                 | 46.1 |
| Carter B et al.              | Yes             | 73.0 ± 6.3  | No              | 57.7        | Yes                          | Hypertension                                | 51.4 |
| Chen F et al.                | No              | 53.0 ± 9.8  | No              | 44.7        | No                           | Hypertension                                | 34.8 |
| Chen R et al.                | No              | 56.0 ± 14.5 | No              | 57.1        | No                           | -                                           |      |
| Chen T et al.                | No              | 59.5 ± 7.5  | Yes             | 62.4        | No                           | -                                           |      |
| Cheng A et al.               | Yes             | 63.3 ± 5.5  | Yes             | 60.0        | Yes                          | Comorbidity                                 | 57.0 |

|                            |     |             |  |     |      |  |     |                            |       |
|----------------------------|-----|-------------|--|-----|------|--|-----|----------------------------|-------|
| Ciceri F et al.            | Yes | 65.7 ± 7.4  |  | Yes | 71.8 |  | Yes | Comorbidity                | 58.3  |
| Deng Y et al.              | No  | 55.1 ± 14.1 |  | No  | 55.1 |  | No  | -                          |       |
| Du RH et al.               | No  | 57.6 ± 13.7 |  | No  | 54.2 |  | No  | Malignancy                 | 2.2   |
| Gao S et al.               | Yes | 71.5 ± 2.9  |  | No  | 48.0 |  | Yes | Hypertension               | 54.8  |
| Garcia PDW et al.          | Yes | 62.5 ± 5.2  |  | Yes | 75.1 |  | Yes | "critically ill patients"  | 100.0 |
| Gavin W et al.             | No  | 60.0 ± 6.9  |  | No  | 51.4 |  | Yes | Hypertension               | 68.6  |
| Gayam V et al.             | Yes | 66.5 ± 5.8  |  | No  | 56.6 |  | Yes | Hypertension               | 66.4  |
| Harmouch F et al.          | Yes | 63.5 ± 21.2 |  | No  | 57.1 |  | Yes | Hypertension               | 50.3  |
| Hu H et al.                | Yes | 60.8 ± 16.3 |  | No  | 50.9 |  | Yes | "critically ill patients"  | 100.0 |
| Huang J et al.             | No  | 53.4 ± 16.7 |  | No  | 53.5 |  | No  | Comorbidity                | 33.1  |
| Hwang JM et al.            | Yes | 67.6 ± 15.3 |  | No  | 50.0 |  | Yes | Hypertension               | 55.3  |
| Khalil K et al.            | Yes | 66.9 ± 17.0 |  | No  | 59.1 |  | No  | Hypertension               | 45.0  |
| Klang E et al. (<=50y)     | No  | 40.7 ± 3.9  |  | Yes | 69.4 |  | No  | Obesity                    | 48.1  |
| Klang E et al. (>50y)      | Yes | 71.1 ± 6.1  |  | No  | 55.2 |  | Yes | Hypertension               | 74.9  |
| Krishnan S et al.          | Yes | 66.0 ± 13.0 |  | Yes | 62.5 |  | Yes | Hypertension               | 73.0  |
| Laguna-Goya R et al.       | No  | 52.0 ± 4.6  |  | Yes | 63.3 |  | No  | Hypertension               | 27.7  |
| Li Q et al.                | No  | 55.5 ± 6.9  |  | No  | 51.0 |  | No  | -                          |       |
| Lieberman-Cribbin W et al. | -   | NA          |  | -   | NA   |  | No  | Pulmonary disease          | 10.7  |
| Liu Q et al.               | Yes | 62.5 ± 5.2  |  | No  | 50.3 |  | Yes | "critically ill patients"  | 100.0 |
| Long H et al.              | Yes | 63.6 ± 13.9 |  | No  | 57.4 |  | Yes | "severe/critical patients" | 66.1  |
| Luo M et al.               | No  | 60.0 ± 5.8  |  | No  | 51.2 |  | No  | -                          |       |
| Luo X et al.               | No  | 55.8 ± 8.4  |  | No  | 50.3 |  | Yes | "severe/critical illness"  | 52.7  |
| Luo Y et al. (a)           | Yes | 60.1 ± 15.2 |  | No  | 49.4 |  | No  | -                          |       |
| Luo Y et al. (b)           | No  | 59.9 ± 15.3 |  | No  | 50.5 |  | No  | Hypertension               | 27.6  |
| Masetti C et al.           | Yes | 60.7 ± 14.2 |  | Yes | 64.6 |  | Yes | Comorbidity                | 54.1  |
| Mikami T et al.            | Yes | 65.5 ± 9.1  |  | No  | 54.5 |  | No  | Hypertension               | 33.0  |
| Okoh AK et al.             | Yes | 61.8 ± 7.2  |  | No  | 51.0 |  | Yes | Hypertension               | 69.7  |

|                              |     |             |  |     |      |  |     |                        |       |
|------------------------------|-----|-------------|--|-----|------|--|-----|------------------------|-------|
| Pan F et al.                 | Yes | 66.9 ± 5.5  |  | Yes | 68.5 |  | Yes | "severe COVID-19"      | 100.0 |
| Rastad H et al.              | No  | 54.8 ± 16.9 |  | No  | 53.7 |  | No  | Comorbidity            | 25.3  |
| Richardson S et al. (18-65y) | No  | -           |  | Yes | 62.3 |  | No  | -                      |       |
| Richardson S et al. (>65y)   | Yes | -           |  | No  | 57.1 |  | No  | -                      |       |
| Rivera-Izquierdo M et al.    | Yes | 64.7 ± 15.4 |  | No  | 55.0 |  | Yes | Comorbidity            | 56.7  |
| Ruan Q et al.                | No  | 56.8 ± 15.0 |  | Yes | 68.0 |  | No  | -                      |       |
| Salacup G et al.             | Yes | 66.5 ± 5.2  |  | No  | 51.0 |  | Yes | Hypertension           | 74.4  |
| Shah P et al.                | Yes | 62.0 ± 6.3  |  | No  | 41.8 |  | Yes | Hypertension           | 79.7  |
| Shang Y et al.               | Yes | 65.6 ± 4.8  |  | Yes | 64.6 |  | Yes | Comorbidity            | 63.7  |
| Shi S et al.                 | Yes | 62.0 ± 6.3  |  | No  | 48.0 |  | Yes | "severe COVID-19"      | 100.0 |
| Soares RCM et al.            | -   | NA          |  | No  | 57.1 |  | No  | Cardiovascular disease | 45.7  |
| Sun H et al.                 | Yes | 69.7 ± 3.7  |  | No  | 54.5 |  | No  | -                      |       |
| Wang K et al.                | No  | 48.3 ± 15.4 |  | No  | 48.2 |  | No  | Hypertension           | 15.6  |
| Xu B et al.                  | Yes | 60.9 ± 6.5  |  | No  | 52.4 |  | No  | Hypertension           | 21.4  |
| Yan X et al.                 | Yes | 61.3 ± 6.0  |  | No  | 49.1 |  | No  | Hypertension           | 23.4  |
| Yang Q et al.                | No  | 53.9 ± 17.1 |  | No  | 50.0 |  | No  | Hypertension           | 37.2  |
| Yang X et al.                | No  | 57.6 ± 6.8  |  | No  | 52.6 |  | No  | -                      |       |
| Ye W et al.                  | No  | 53.5 ± 13.8 |  | No  | 49.6 |  | No  | Diabetes               | 16.3  |
| Yu C et al.                  | Yes | 62.5 ± 5.8  |  | No  | 50.3 |  | No  | -                      |       |
| Zhang JJ et al.              | No  | 56.0 ± 19.1 |  | No  | 53.3 |  | No  | -                      |       |
| Zhou F et al                 | No  | 56.3 ± 6.1  |  | Yes | 62.0 |  | No  | Hypertension           | 47.6  |

NA: not available.
