# Supplementary material for: Predictors of in-hospital COVID-19 mortality: A comprehensive systematic review and meta-analysis exploring differences by age, sex and health conditions
Source: PubMed Central journal article supplement (PMC7608886; doi:10.1371/journal.pone.0241742), 2020-11-03
Supplement: pone.0241742.s007.pdf [file pone.0241742.s007.pdf]

## Supporting Information

### Predictors of in-hospital COVID-19 mortality: a comprehensive systematic review and meta-analysis exploring differences by age, sex and health conditions

**S3 Table. Main meta-analyses results obtained in sensitivity analyses excluding studies with moderate risk of bias in more than one domain<sup>a</sup>.**

| Potential predictor     | Pooled-OR (95% CI) | Potential predictor | Pooled-ES (95% CI)    |
|-------------------------|--------------------|---------------------|-----------------------|
| Dyspnoea                | 2.54 (1.84, 3.50)* | BMI                 | 0.22 (-0.28, 0.71)    |
| Fatigue                 | 1.30 (0.59, 2.87)  | Lymphocyte count    | -2.11 (-2.76, -1.46)* |
| Fever                   | 0.77 (0.64, 0.94)* | Leucocyte count     | 2.90 (2.08, 3.71)*    |
| Myalgia                 | 0.77 (0.32, 1.82)  | Neutrophil count    | 3.37 (2.50, 4.25)*    |
| Cough                   | 0.75 (0.61, 0.93)* | Platelet count      | -1.45 (-1.89, -1.02)* |
| Vomiting                | 0.60 (0.40, 0.89)* | Hemoglobin          | -0.37 (-0.83, 0.10)   |
| Diarrhoea               | 0.59 (0.43, 0.81)* | D-dimer             | 2.81 (2.30, 3.31)*    |
| Headache                | 0.50 (0.28, 0.91)* | Prothrombin time    | 2.13 (1.17, 3.08)*    |
| Obesity                 | 0.99 (0.74, 1.33)  | APTT                | 0.37 (-0.07, 0.81)    |
| Smoking habit           | 1.58 (1.24, 2.02)* | Albumin             | -2.71 (-3.65, -1.77)* |
| Unspecified comorbidity | 4.70 (3.19, 6.91)* | Total bilirubin     | 1.01 (0.49, 1.53)*    |
| Stroke                  | 3.29 (0.85, 12.78) | AST                 | 2.38 (1.73, 3.02)*    |
| Kidney disease          | 3.16 (2.41, 4.15)* | ALT                 | 0.40 (0.07, 0.74)*    |
| CVD                     | 3.11 (2.47, 3.91)* | Urea nitrogen       | 4.21 (2.66, 5.76)*    |
| Hypertension            | 2.64 (2.17, 3.20)* | Creatinine          | 1.87 (1.24, 2.51)*    |
| Malignancy              | 2.40 (1.77, 3.25)* | LDH                 | 3.42 (2.49, 4.35)*    |
| Diabetes                | 2.26 (1.88, 2.73)* | CRP                 | 3.73 (3.02, 4.45)*    |
| Pulmonary disease       | 2.05 (1.31, 3.21)* | Interleukin-6       | 3.27 (2.06, 4.49)*    |
| Liver disease           | 1.65 (1.11, 2.46)* | ESR                 | 0.17 (-0.31, 0.64)    |
|                         |                    | Procalcitonin       | 1.98 (1.21, 2.74)*    |
|                         |                    | Cardiac troponin-I  | 1.39 (0.70, 2.08)*    |
|                         |                    | Ferritin            | 2.00 (1.41, 2.60)*    |

\* p-value <0.05

**ALT:** alanine transaminase; **APTT:** activated partial thromboplastin time, **AST:** aspartate transaminase; **BMI:** body mass index; **CRP:** C-reactive protein; **ESR:** erythrocyte sedimentation rate, **LDH:** lactate dehydrogenase.

<sup>a</sup>Excluded studies: Aloisio E et al., Asghar MS et al., Baqui P et al., Borobia AM et al., Chen F et al., Deng Y et al., Gavin W et al., Harmouch F et al., Krishnan S et al., Richardson S et al. and Yang X et al.
